# Supplementary material for: Synthetic, spectroscopic, and structural studies on organoimido molybdenum, tungsten, and rhenium phthalocyanines
Source: Royal Society of Chemistry journal article supplement (doi:10.1039/c0dt01166e), 2010-12-20
Supplement: c0dt01166e.pdf [file c0dt01166e.pdf]

# Synthetic, Spectroscopic, and Structural Studies on Organoimido Molybdenum, Tungsten, and Rhenium Phthalocyanines

Wael Darwish, Elisabeth Seikel, Klaus Harms, Olaf Burghaus and Jörg Sundermeyer\*

Philipps-Universität Marburg, Fachbereich Chemie, Hans-Meerwein Straße, 35043 Marburg. Fax: + 49 6421 2825711 Tel:+49 6421 2825693 E-mail:jsu@staff.uni-marburg.de

## Supporting Information

Selected analytical data of compounds **1-7** are given.

|                                                                      |   |
|----------------------------------------------------------------------|---|
| APCI-HRMS spectrum of <b>1</b> .....                                 | 2 |
| APCI-HRMS spectrum of <b>2</b> .....                                 | 3 |
| APCI-HRMS spectrum of <b>3</b> .....                                 | 4 |
| APCI-HRMS spectrum of <b>4</b> .....                                 | 5 |
| APCI-HRMS spectrum of <b>5</b> .....                                 | 6 |
| APCI spectrum and <sup>1</sup> H NMR spectrum of <b>6</b> .....      | 7 |
| MALDI-TOF spectrum and <sup>1</sup> H NMR spectrum of <b>7</b> ..... | 8 |

# [PcMo(NtBu)Cl] 1

Seikel\_es-85-APCI\_091123115308

11/23/2009 11:53:08 AM

Seikel\_es-85-APCI\_091123115308 #36-48 RT: 0.28-0.36 AV: 6 NL: 4.88E6  
:: ITMS + c APCI corona Full ms [200.00-2000.00]

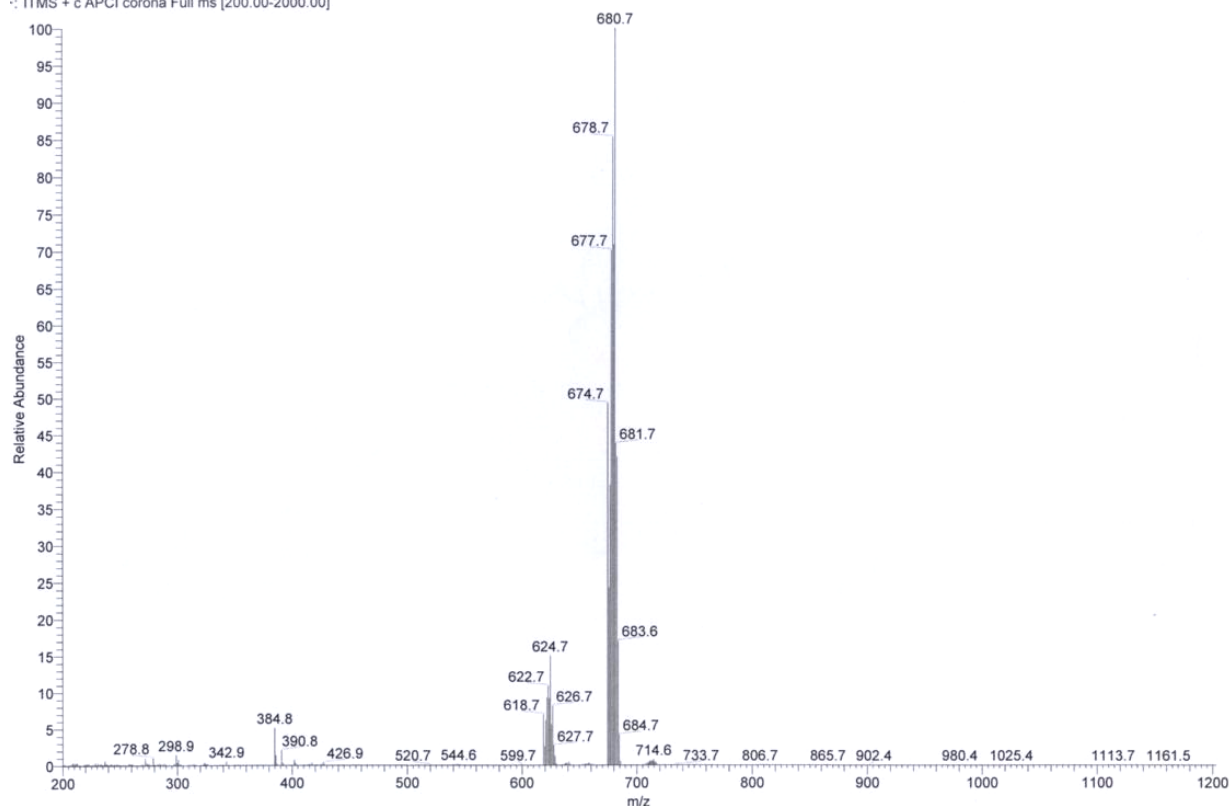

Seikel\_es-85-APCI\_091123115308

11/23/2009 11:53:08 AM

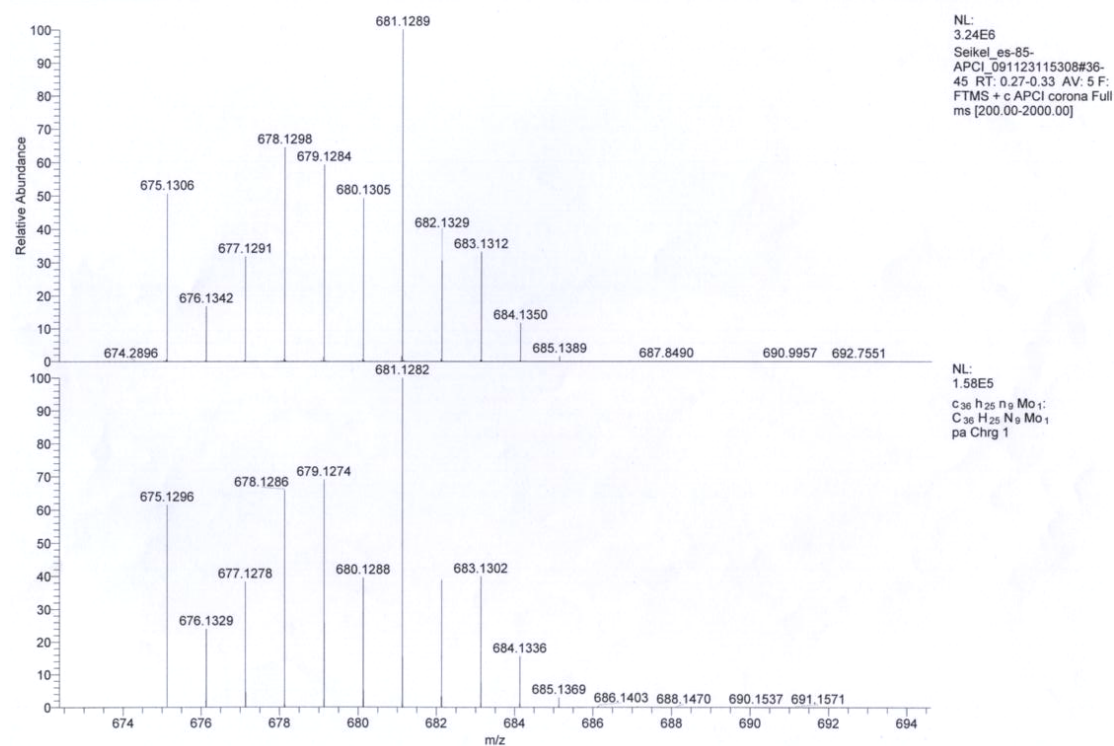

APCI-MS (top) and APCI-HRMS (bottom) of 1.

# [PcMo(NMes)Cl] 2

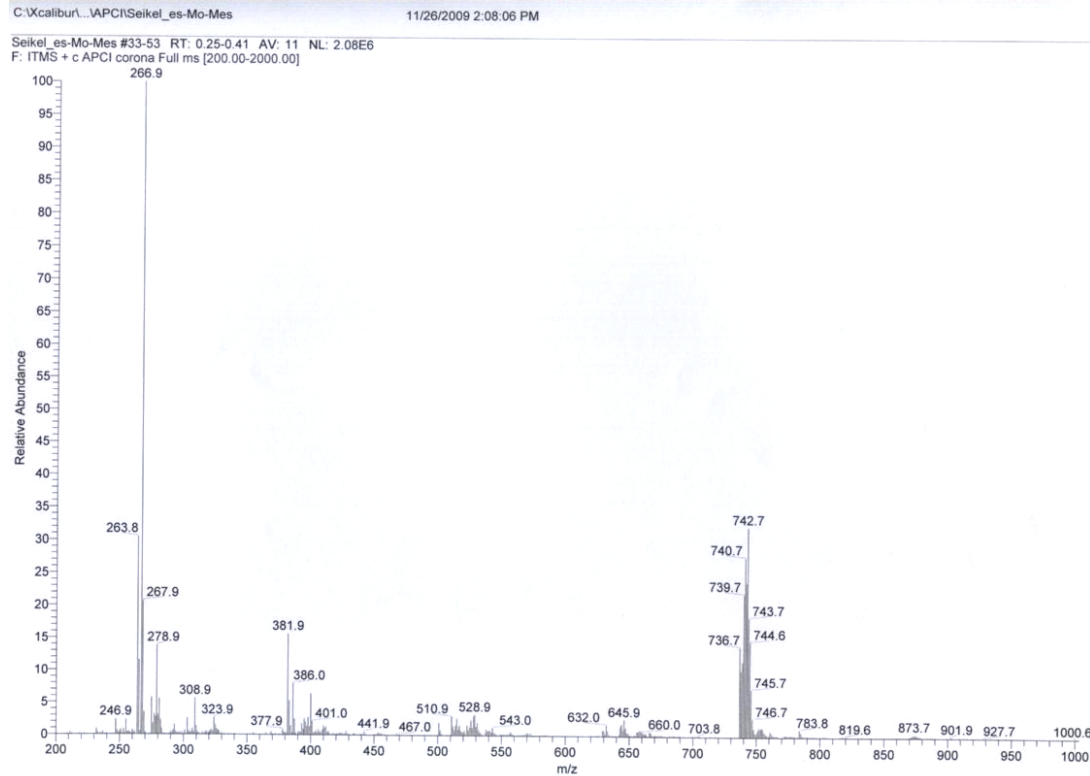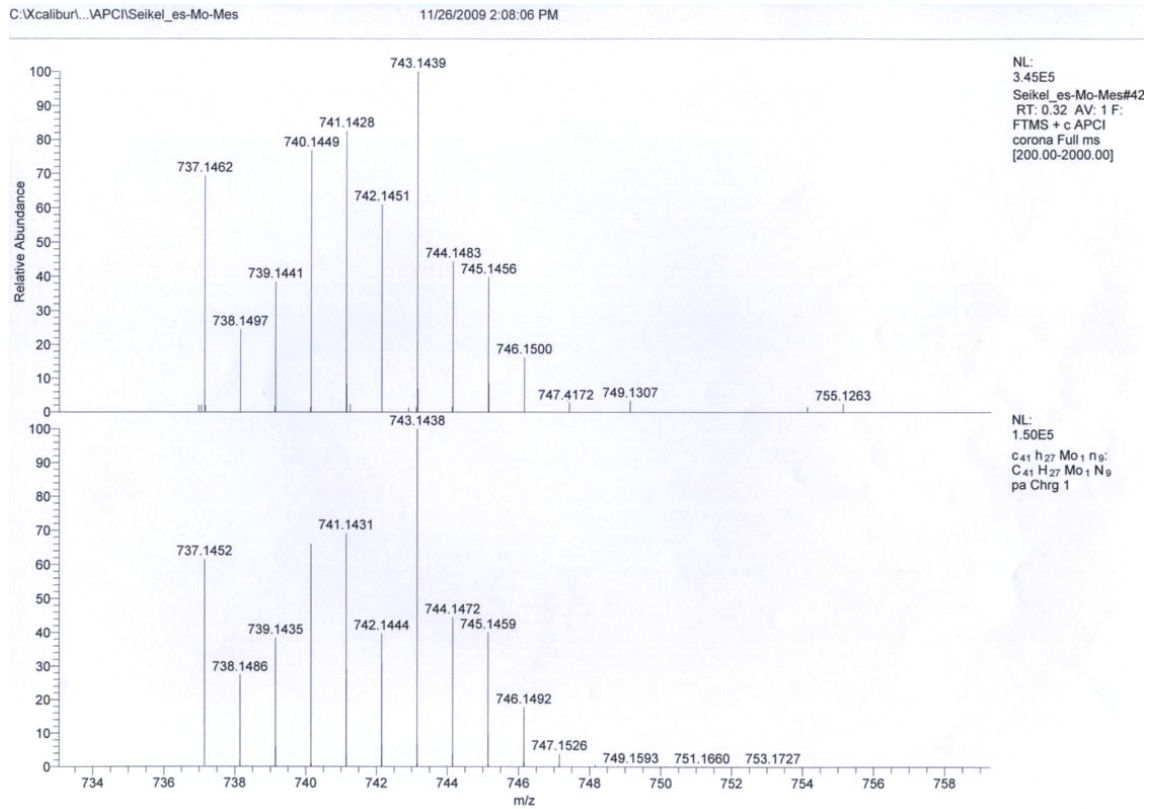

APCI-MS (top) and APCI-HRMS (bottom) of 2.

# [PcW(NtBu)Cl] 3

C:\Xcalibur\...11109\APCI\Seikel\_es-WtBu

11/26/2009 2:27:24 PM

Seikel\_es-WtBu #32-52 RT: 0.25-0.39 AV: 10 SB: 9 0.01-0.13 NL: 3.43E5  
F: FTMS + c APCI corona Full ms [200.00-2000.00]

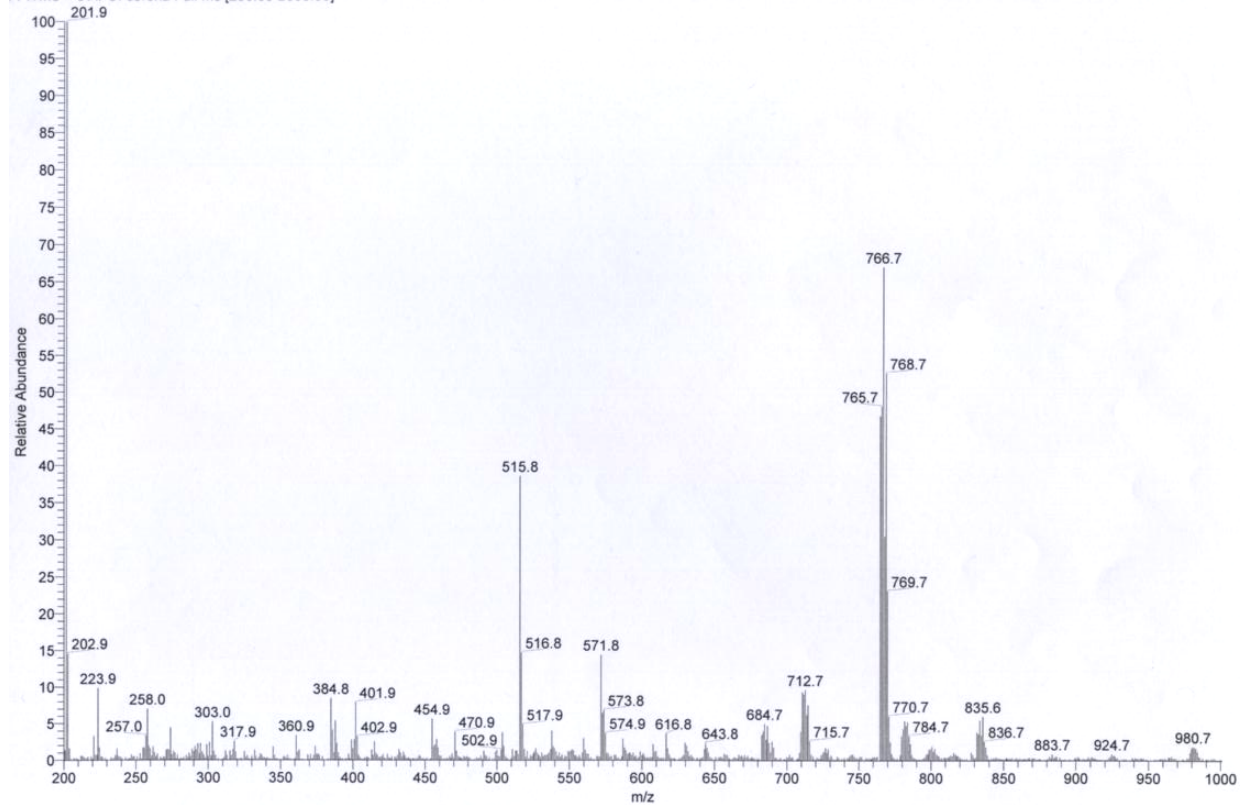

C:\Xcalibur\...11109\APCI\Seikel\_es-WtBu

11/26/2009 2:27:24 PM

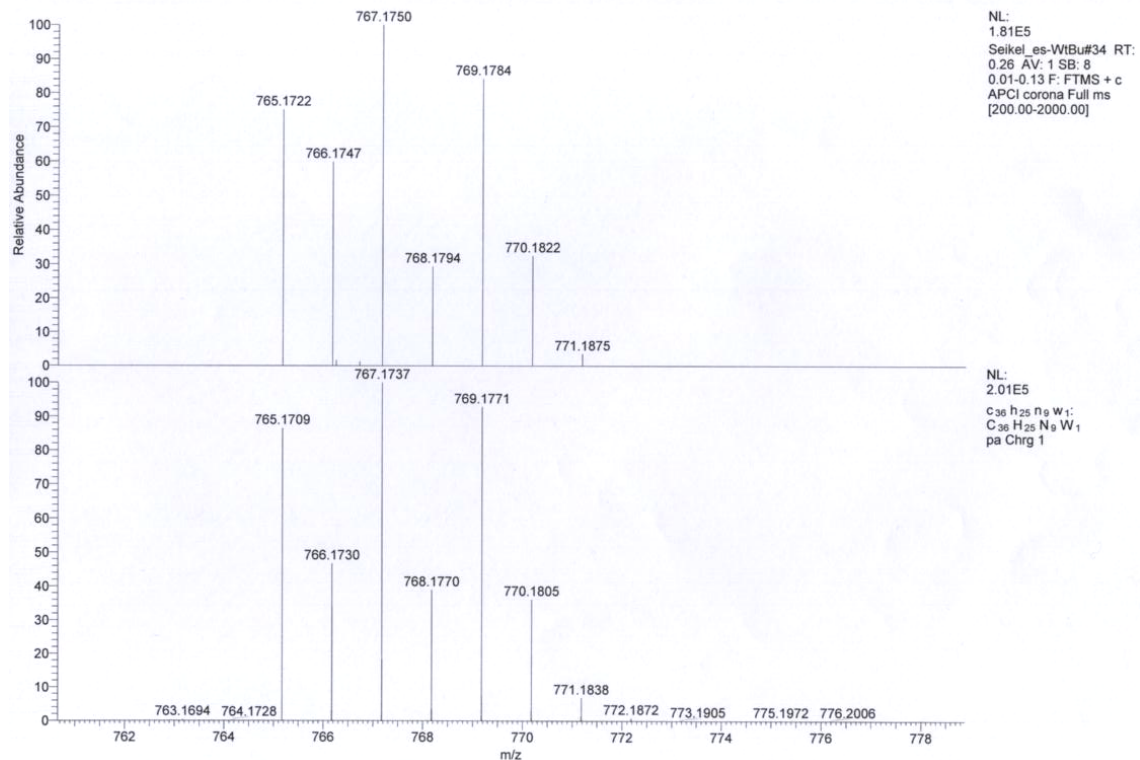

APCI-MS (top) and APCI-HRMS (bottom) of 3.

# [PcW(NMes)Cl] 4

C:\Xcalibur\...1109\APCI\Seikel\_es-WMes

11/26/2009 2:19:56 PM

Seikel\_es-WMes #34-43 RT: 0.27-0.33 AV: 5 NL: 1.56E6  
=: ITMS + c APCI corona Full ms [200.00-2000.00]

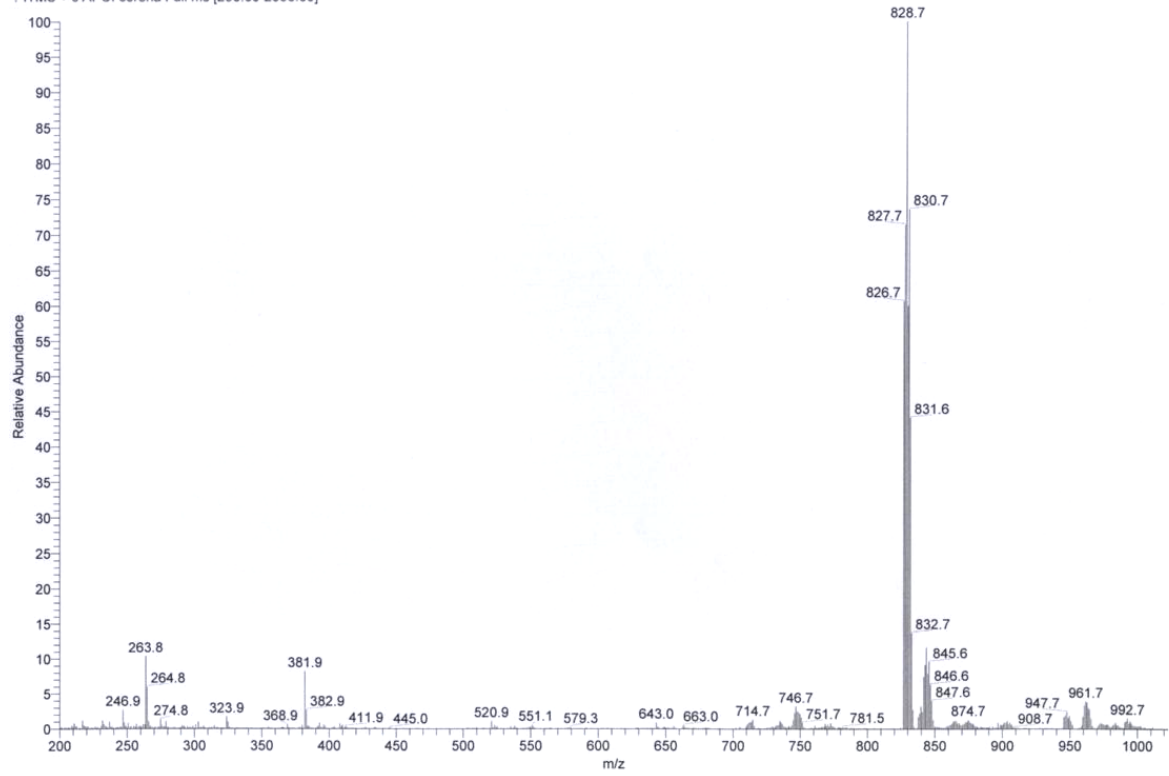

C:\Xcalibur\...1109\APCI\Seikel\_es-WMes

11/26/2009 2:19:56 PM

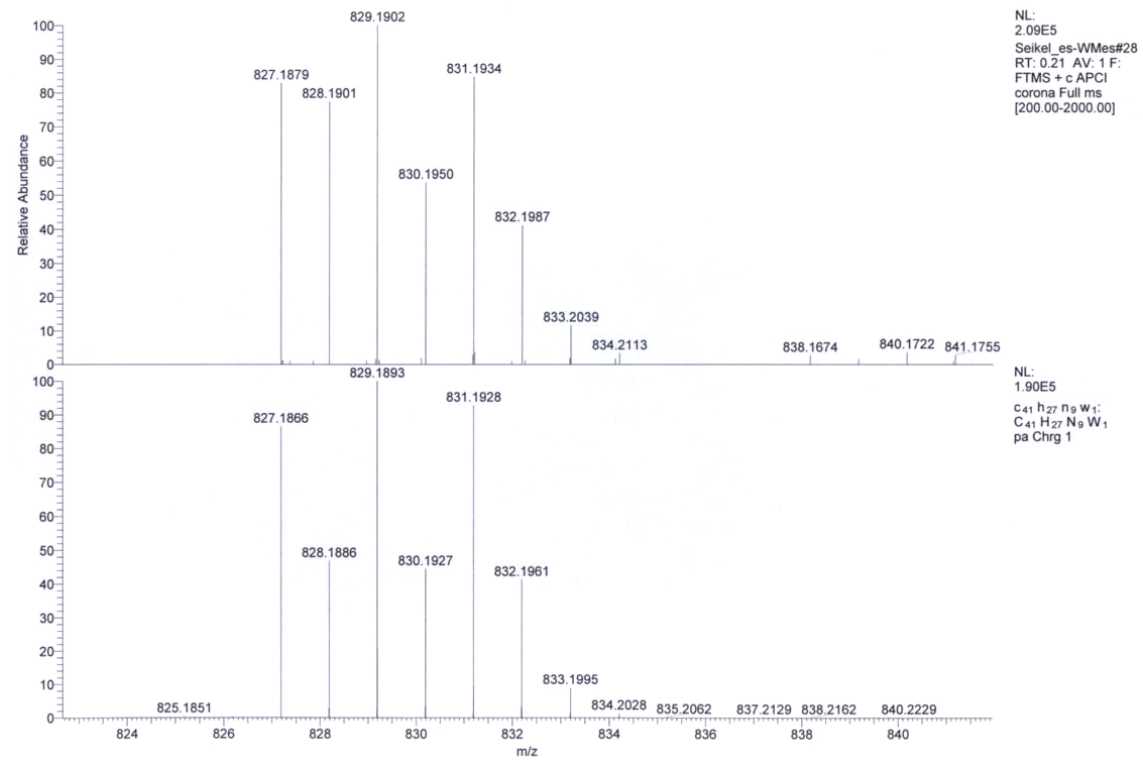

APCI-MS (top) and APCI-HRMS (bottom) of 4.

# [PcW(NTs)Cl] 5

C:\Xcalibur\...APCI\Seikel\_es-123-2

4/22/2010 8:15:42 AM

Seikel\_es-123-2 #33-48 RT: 0.26-0.37 AV: 8 SB: 12 0.01-0.18 NL: 2.75E5  
F: ITMS + c APCI corona Full ms [189.00-1890.00]

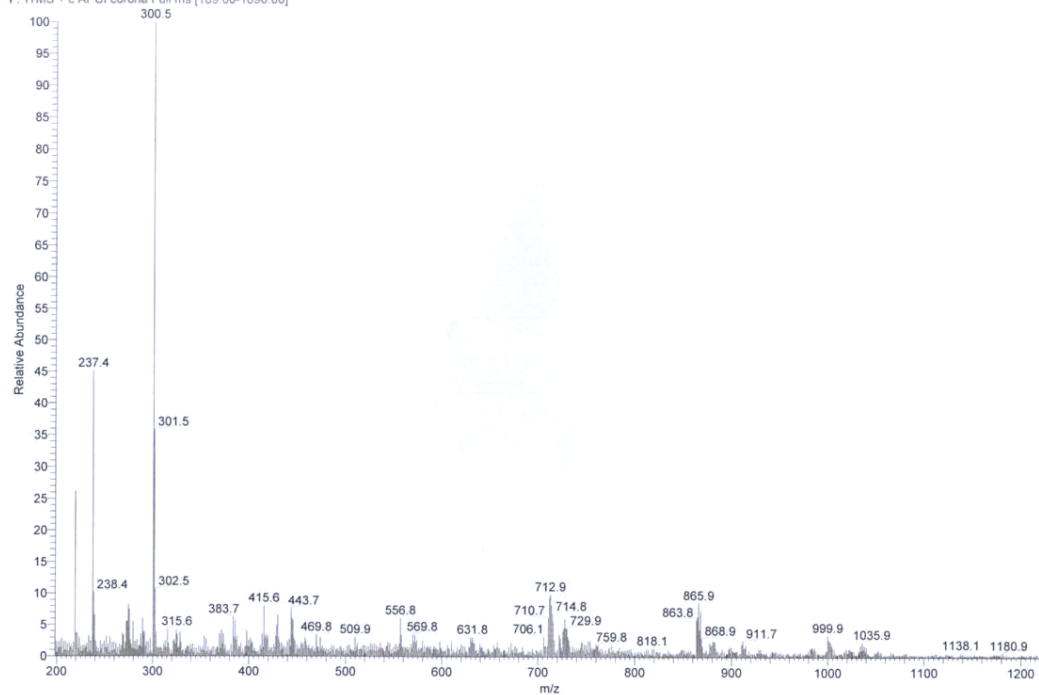

Partial hydrolysis occurred during the preparation of the sample.

C:\Xcalibur\...APCI\Seikel\_es-123-2

4/22/2010 8:15:42 AM

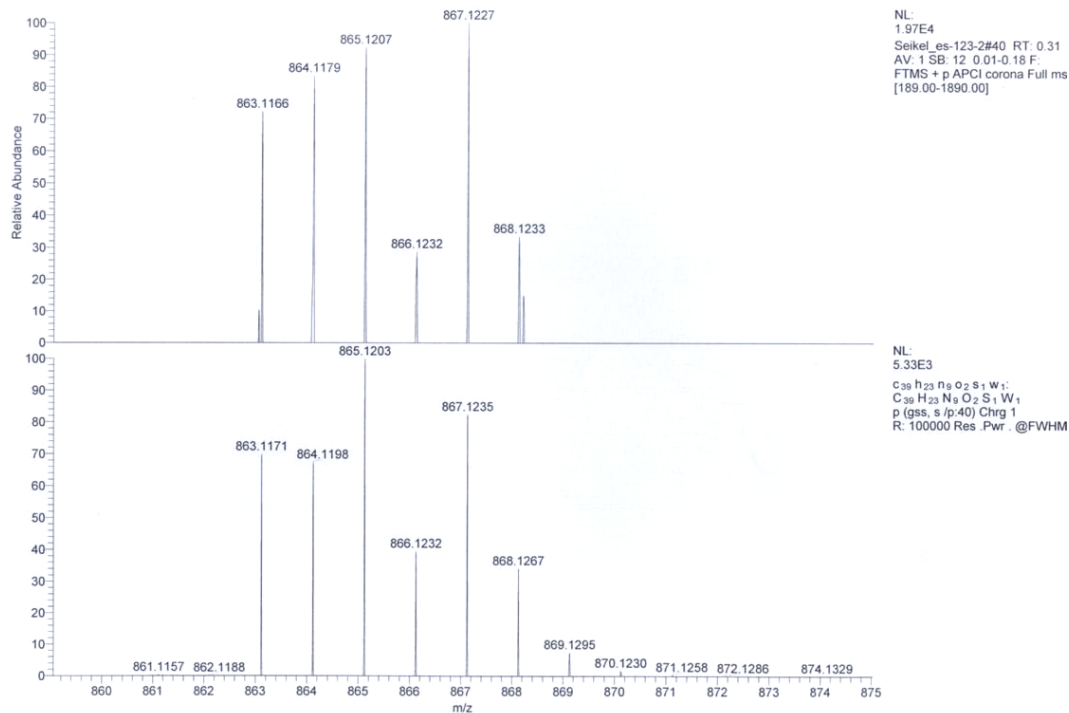

APCI-MS (top) and APCI-HRMS (bottom) of 5.

# [PcRe(NtBu)Cl] 6

C:\Xcalibur\...APCI\Seikel\_es-RetBu

11/26/2009 2:36:06 PM

Seikel\_es-RetBu #34-54 RT: 0.27-0.41 AV: 10 SB: 9 0.01-0.13 NL: 7.99E4  
F: ITMS + c APCI corona Full ms [200.00-2000.00]

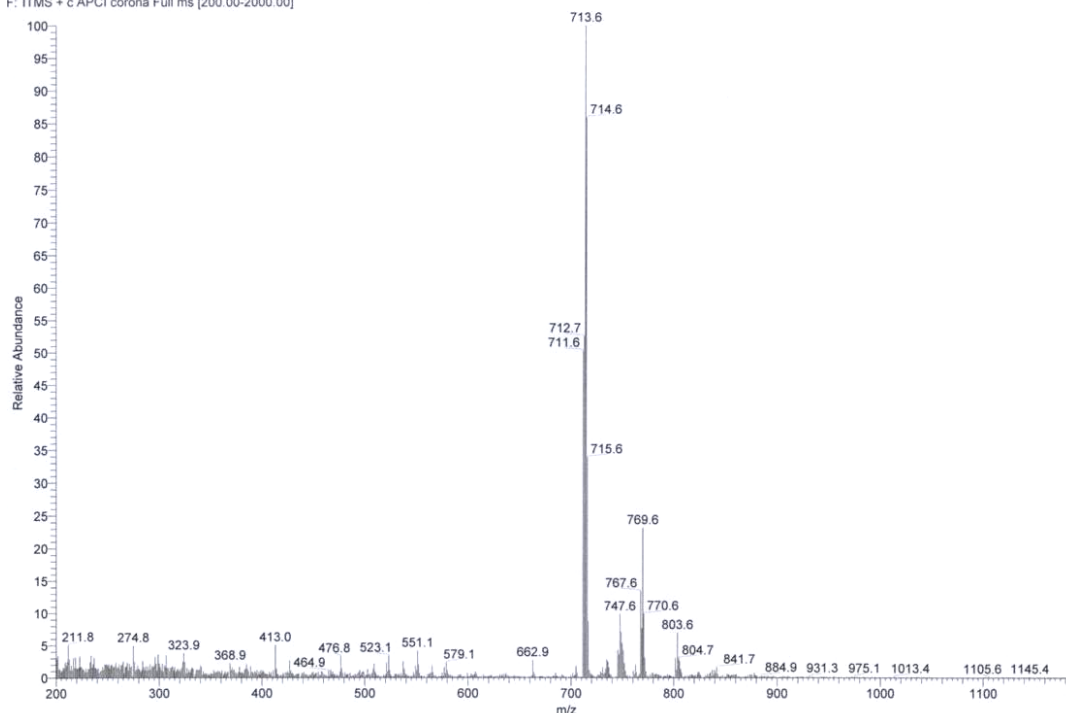

APCI-MS of 6. Partial hydrolysis occurred during the preparation of the sample. No HRMS spectrum could be obtained due to low intensity.

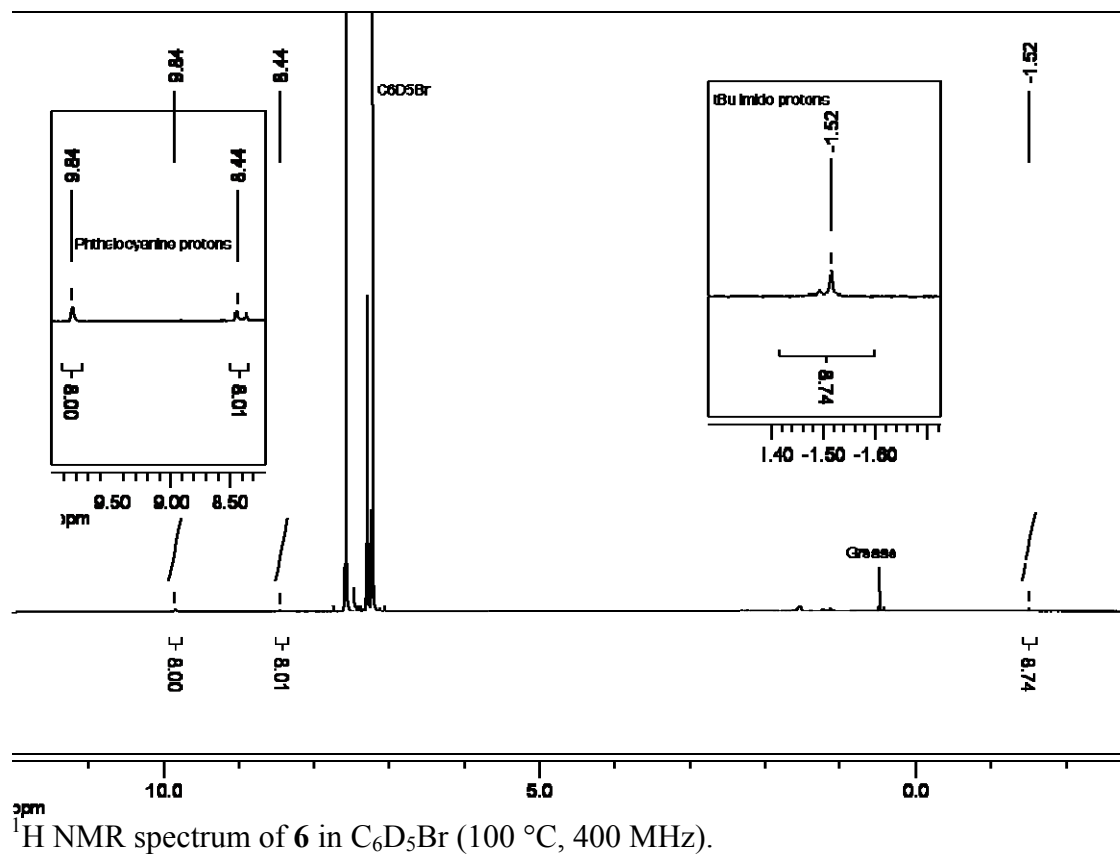

$^1\text{H}$  NMR spectrum of 6 in  $\text{C}_6\text{D}_5\text{Br}$  (100 °C, 400 MHz).

[PcRe(NMes)Cl] 7

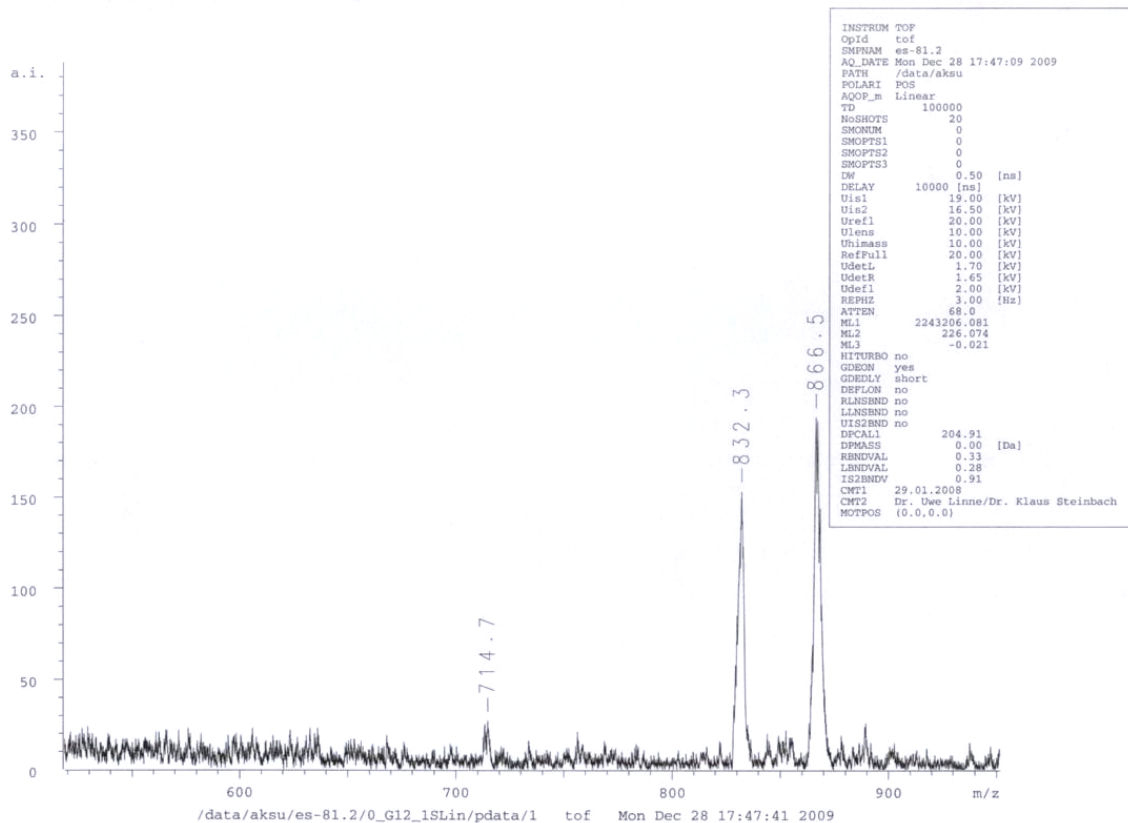

MALDI-TOF-MS of 7.

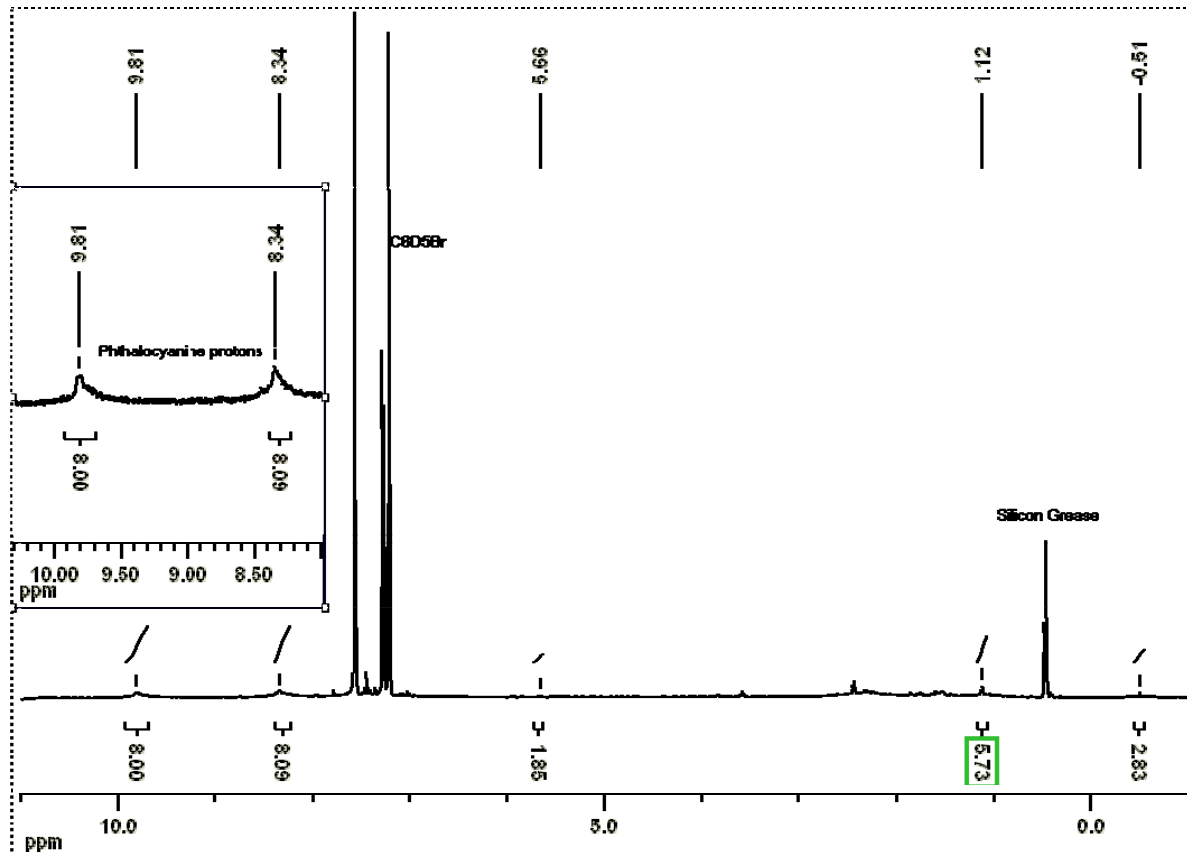

<sup>1</sup>H NMR spectrum of 7 in C<sub>6</sub>D<sub>5</sub>Br (100 °C, 400 MHz).
